# Supplementary material
Source: PubMed Central journal article supplement (PMC6120797)
Supplement: NIHMS971029-supplement-supplement_1.pdf [file NIHMS971029-supplement-supplement_1.pdf]

Supplementary Figure 1

Cumulative risk (hazard) for radiologic progression over the 16-year study period for high risk individuals after baseline screening

Supplementary Figure 2

Cumulative risk (hazard) for radiologic progression stratified by baseline age > 60 years (red upper curve) and  $\leq$ 60 years (blue lower curve) ( $p=0.0001$ ).

Supplementary Table 1

Association of Neoplastic Progression with Type of Radiologic Worrisome Feature

HRI n = 354 (Univariate Analysis)

| Radiologic Worrisome Feature         | Number (%) of<br>All 354 HRI with<br>Feature | Frequency (%)<br>Associated with<br>PDAC and/or High<br>Grade Precursor<br>Neoplasm | p value |
|--------------------------------------|----------------------------------------------|-------------------------------------------------------------------------------------|---------|
| Solid mass                           | 28 (7.9%)                                    | 12/28 (43%)                                                                         | <0.0001 |
| Cyst or MPD with mural nodule        | 6 (1.7%)                                     | 5/6 (83%)                                                                           | <0.0001 |
| Multiple cysts $\geq 3$ at baseline  | 20 (5.7%)                                    | 12/20 (60%)                                                                         | <0.0001 |
| Cyst > 3 cm                          | 2 (0.6%)                                     | 1(50%)                                                                              | 1.0     |
| Cyst wall thick or enhancing         | 5 (1.4%)                                     | 3/5(60%)                                                                            | 0.003   |
| Cyst growth rate > 4 mm in 1 year    | 11 (3.1%)                                    | 3/11(27%)                                                                           | 0.032   |
| Dilated MPD at baseline <sup>2</sup> | 76 (21.5%)                                   | 14/76(18%)                                                                          | <0.0001 |
| Dilated MPD $\geq 5$ mm anytime      | 21 (5.9%)                                    | 3/21(14%)                                                                           | 0.162   |

<sup>1</sup>High grade precursor neoplasm = intraductal papillary mucinous neoplasm (IPMN) with high grade dysplasia or pancreatic intraepithelial neoplasia (PanIN)-3

<sup>2</sup>Dilated MPD defined by Rosemont criteria<sup>1</sup> ( $\geq 3.5$  mm in the head,  $\geq 2.5$  mm in the body, and/or  $\geq 1.5$  mm in the tail), < 5 mm

Pathological diagnoses made by surgery in 48, percutaneous or EUS-guided FNA in 5 HRI

1. Catalano MF, Sahai A, Levy M, et al. EUS-based criteria for the diagnosis of chronic pancreatitis: the Rosemont classification. *Gastrointest Endosc* 2009;69:1251-61.

Supplementary Table 2 Cox Proportional Hazards Regression Model

Showing Estimated Hazard Ratios for Radiological Progression

|                                                                    | Unadjusted Model |         |            | Adjusted Model |         |            |
|--------------------------------------------------------------------|------------------|---------|------------|----------------|---------|------------|
|                                                                    | Hazard Ratio     | p-value | 95% CI     | Hazard Ratio   | p-value | 95% CI     |
| Age at baseline > 60 years                                         | 3.0              | <0.0001 | 1.72, 5.36 | 3.1            | <0.0001 | 1.69, 5.70 |
| Mutation carrier                                                   | 1.4              | 0.362   | 0.69, 2.77 | 2.7            | 0.017   | 1.20, 6.25 |
| Total lesions at baseline $\geq 3$                                 | 4.9              | <0.0001 | 2.70, 8.70 | 4.3            | <0.0001 | 2.32, 7.92 |
| Total number of relatives with PDAC (for each additional relative) | 1.0              | 0.925   | 0.79, 1.23 | 1.1            | 0.640   | 0.81, 1.40 |
| Dilated MPD at baseline <sup>1</sup>                               | 3.5              | <0.0001 | 1.98, 6.04 | 4.2            | <0.0001 | 2.40, 7.49 |

PDAC = pancreatic ductal adenocarcinoma, MPD = main pancreatic duct

<sup>1</sup>Dilated MPD defined by Rosemont criteria ( $\geq 3.5$  mm in the head,  $\geq 2.5$  mm in the body, and/or  $\geq 1.5$  mm in the tail), up to 5 mm

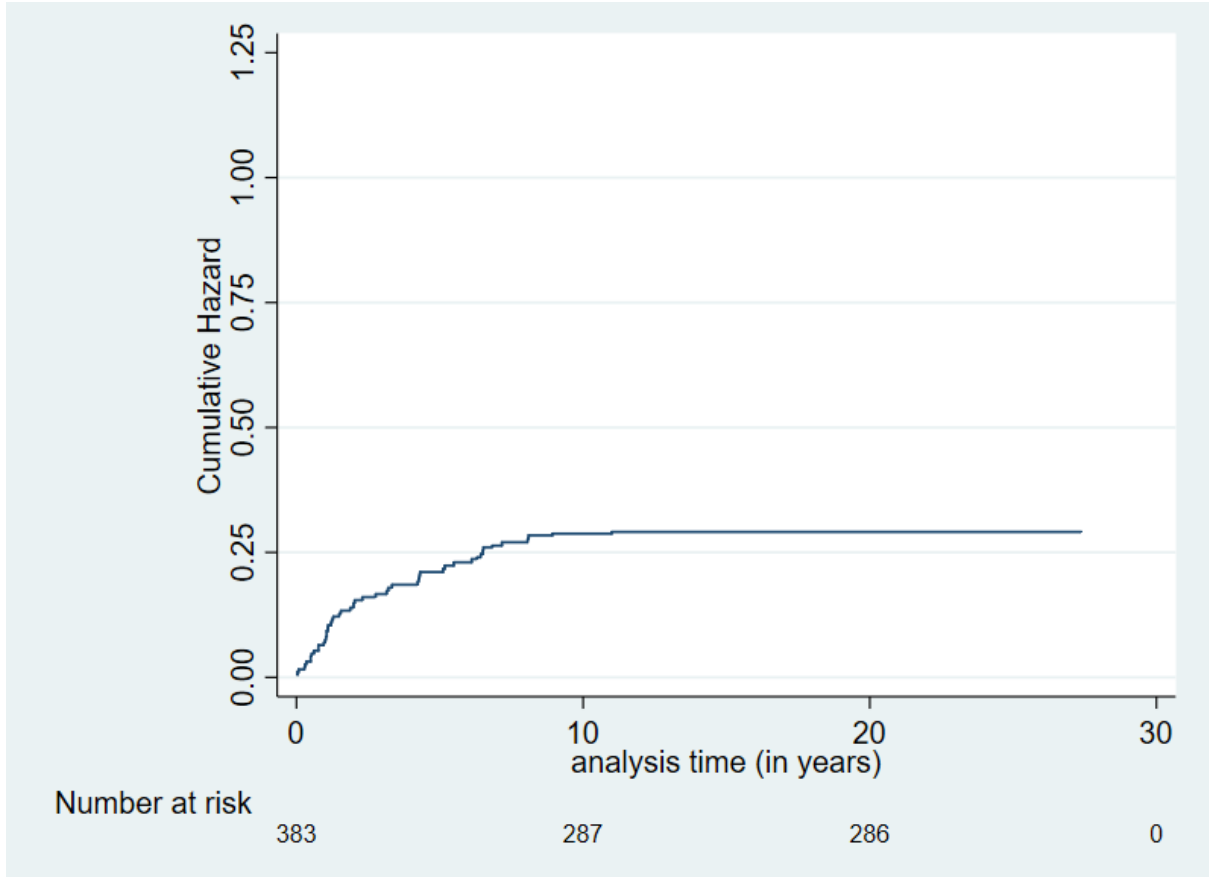

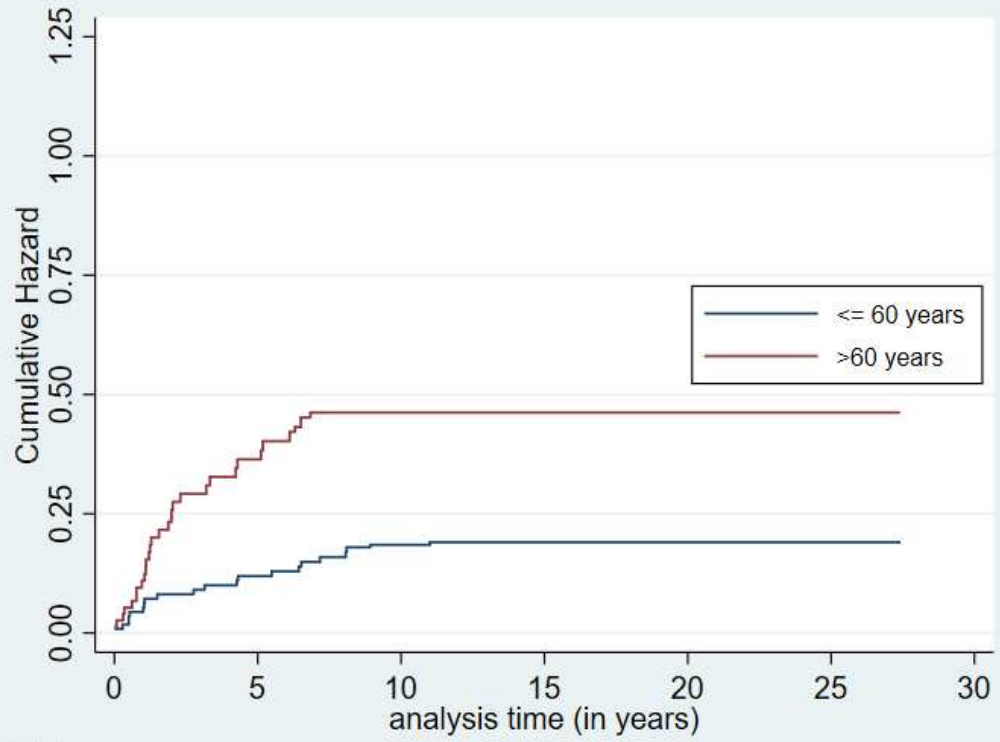

**Number at risk**

|            |     |     |     |     |     |     |   |
|------------|-----|-----|-----|-----|-----|-----|---|
| <=60 years | 230 | 204 | 191 | 190 | 190 | 190 | 0 |
| >60 years  | 153 | 106 | 96  | 96  | 96  | 96  | 0 |
